# Supplementary material for: Identification of beta-arrestin-1 as a diagnostic biomarker in lung cancer
Source: PubMed Central journal article supplement (PMC6162208; doi:10.1038/s41416-018-0200-0), 2018-08-06
Supplement: 41416_2018_200_MOESM1_ESM.pdf [file 41416_2018_200_MOESM1_ESM.pdf]

**Supplementary Table 1. Clinicopathological features of lung cancer patients from the Luxembourg cohort who provided tissue samples.**

| Patient n° | Gender | Age at collection (y) | Smoking History (pack-year) | Diagnosis | Stage | Grade  | Anatomic site of the collected tumour sample |
|------------|--------|-----------------------|-----------------------------|-----------|-------|--------|----------------------------------------------|
| 1          | M      | 70                    | Current smoker              | SCC       | IA    | I      | Lung                                         |
| 2          | M      | 59                    | Current smoker              | ADC       | IA    | N/A    | Lung                                         |
| 3          | F      | 50                    | Current smoker              | ADC       | IA    | II     | Lung                                         |
| 4          | F      | 65                    | Former smoker               | ADC       | IB    | N/A    | Lung                                         |
| 5          | M      | 77                    | Former smoker               | SCC       | IA    | I      | Lung                                         |
| 6          | M      | 64                    | Never smoker                | ADC       | IIA   | N/A    | Lung                                         |
| 7          | M      | 59                    | Former smoker               | SCC       | IIIA  | I      | Lung                                         |
| 8          | F      | 64                    | Current smoker              | ADC       | IA    | I      | Lung                                         |
| 9          | M      | 63                    | Current smoker              | SCC       | IA    | I      | Lung                                         |
| 10         | F      | 85                    | Never smoker                | ADC       | IIB   | I      | Lung                                         |
| 11         | M      | 75                    | Former smoker               | ADC       | IIIA  | II     | Lung                                         |
| 12         | M      | 62                    | Current smoker              | ADC       | IB    | I      | Lung                                         |
| 13         | F      | 55                    | Former smoker               | ADC       | IA    | I      | Lung                                         |
| 14         | M      | 76                    | Former smoker               | SCC       | IA    | I      | Lung                                         |
| 15         | M      | 69                    | Former smoker               | SCC       | N/A   | I      | Lung                                         |
| 16         | M      | 62                    | Former smoker               | ADC       | IIB   | III    | Lung                                         |
| 17         | F      | 72                    | Current smoker              | ADC       | N/A   | III    | Lung                                         |
| 18         | M      | 59                    | Former smoker               | SCC       | IIIA  | I      | Lung                                         |
| 19         | M      | 50                    | Never smoker                | ADC       | IV    | I      | Lung + soft tissue (metastasis)              |
| 20         | F      | 65                    | Never smoker                | ADC       | IV    | III    | Lung                                         |
| 21         | M      | 79                    | Former smoker               | SCC       | IIB   | I      | Lung                                         |
| 22         | M      | 47                    | Former smoker               | ADC       | IV    | I      | Bone (metastasis)                            |
| 23         | M      | 73                    | Current smoker              | ADC       | IA    | I      | Lung                                         |
| 24         | F      | 66                    | Former smoker               | SCC       | IA    | III    | Lung                                         |
| 25         | M      | 49                    | Former smoker               | ADC       | IV    | III    | Bone (metastasis)                            |
| 26         | M      | 53                    | Never smoker                | ADC       | IV    | N/A    | Lymph node (metastasis)                      |
| 27         | M      | 74                    | Former smoker               | ADC       | IB    | II~III | Lung                                         |
| 28         | M      | 72                    | Former smoker               | ADC       | IA    | III    | Lung                                         |
| 29         | F      | 54                    | Former smoker               | ADC       | IV    | III    | Brain (metastasis)                           |
| 30         | M      | 62                    | Former smoker               | ADC       | N/A   | II     | Lung                                         |
| 31         | F      | 71                    | Never smoker                | ADC       | IV    | N/A    | Lung                                         |
| 32         | F      | 76                    | Current smoker              | ADC       | IB    | II     | Lung                                         |
| 33         | M      | 79                    | Former smoker               | SCC       | IIB   | I      | Lung                                         |
| 34         | F      | 55                    | Former smoker               | ADC       | IV    | III    | Brain (metastasis)                           |
| 35         | M      | 67                    | Current smoker              | ADC       | IB    | I      | Lung                                         |
| 36         | M      | 71                    | Former smoker               | ADC       | IA    | II     | Lung                                         |
| 37         | M      | 83                    | Former smoker               | SCC       | IIA   | III    | Lung                                         |
| 38         | F      | 84                    | Never smoker                | ADC       | IA    | I      | Lung                                         |

Diagnosis and staging of lung cancer patients were done by pathologists in Luxembourg's hospitals following the IASLC/ATS/ERS histological classification of lung tumours (2011) and TNM classification of lung carcinoma (2009). Grade I = well-differentiated; Grade II = moderately-differentiated; Grade III = poorly-differentiated. N/A = information not available.
