# Supplementary material for: Identification of beta-arrestin-1 as a diagnostic biomarker in lung cancer
Source: PubMed Central journal article supplement (PMC6162208; doi:10.1038/s41416-018-0200-0), 2018-08-06
Supplement: 41416_2018_200_MOESM2_ESM.pdf [file 41416_2018_200_MOESM2_ESM.pdf]

**Supplementary Table 2. Clinicopathological features of lung cancer patients and healthy donors from the Luxembourg cohort who provided blood samples.**

| Features                                               |                 | Lung cancer diagnosis |              |              | No cancer diagnosis |
|--------------------------------------------------------|-----------------|-----------------------|--------------|--------------|---------------------|
|                                                        |                 | ADC                   | SCC          | Others*      |                     |
| N° of subjects                                         |                 | 72                    | 24           | 32           | 93                  |
| Gender                                                 | Female          | 34                    | 4            | 13           | 42                  |
|                                                        | Male            | 38                    | 20           | 19           | 51                  |
| Age at blood collection (y)<br>[median value (range)]  |                 | 63 (28-85)            | 71.5 (59-86) | 62.5 (41-77) | 62 (32-85)          |
| Smoking history                                        | Never smokers   | 14                    | 0            | 1            | 14                  |
|                                                        | Former smokers  | 37                    | 19           | 12           | 54                  |
|                                                        | Current smokers | 21                    | 5            | 6            | 25                  |
| Stage                                                  | I               | 13                    | 8            |              |                     |
|                                                        | II              | 3                     | 5            |              |                     |
|                                                        | III             | 4                     | 5            |              |                     |
|                                                        | IV              | 45                    | 3            |              |                     |
|                                                        | not available   | 7                     | 3            |              |                     |
| Grade                                                  | I               | 11                    | 11           |              |                     |
|                                                        | II              | 22                    | 2            |              |                     |
|                                                        | II~III          | 3                     | 0            |              |                     |
|                                                        | III             | 15                    | 8            |              |                     |
|                                                        | not available   | 21                    | 3            |              |                     |
| Anticancer treatment status<br>before blood collection | Untreated       | 51                    | 22           | 26           |                     |
|                                                        | Treated         | 21                    | 2            | 6            |                     |

\*Other lung cancer types and subtypes including NSCLC NOS and adenosquamous carcinoma.

Diagnosis and staging of lung cancer patients were done by pathologists in Luxembourg's hospitals following the IASLC/ATS/ERS histological classification of lung tumours (2011) and TNM classification of lung carcinoma (2009). Grade I = well-differentiated; Grade II = moderately-differentiated; Grade III = poorly-differentiated.
