# Supplementary material for: Identification of beta-arrestin-1 as a diagnostic biomarker in lung cancer
Source: PubMed Central journal article supplement (PMC6162208; doi:10.1038/s41416-018-0200-0), 2018-08-06
Supplement: 41416_2018_200_MOESM3_ESM.pdf [file 41416_2018_200_MOESM3_ESM.pdf]

**Supplementary Table 3. Clinicopathological features of selected lung cancer patients from the amsbio cohort, as provided by the manufacturer.**

| Patient n° | Gender | Age | Diagnosis                    | TNM classification | Stage | Grade  | Anatomic Site of the collected tumour sample |
|------------|--------|-----|------------------------------|--------------------|-------|--------|----------------------------------------------|
| 1          | M      | 69  | SCC                          | T2N0M0             | IB    | III    | Lung                                         |
| 2          | M      | 67  | SCC                          | T3N0M0             | IIB   | III    | Lung                                         |
| 3          | M      | 60  | SCC                          | T2N1M0             | IIB   | I~II   | Lung                                         |
| 4          | M      | 70  | Bronchioloalveolar carcinoma | T2N1M0             | IIB   | II     | Lung                                         |
| 5          | M      | 59  | ADC                          | T2N0M0             | IB    | II     | Lung                                         |
| 6          | M      | 49  | ADC                          | T2N1M0             | IIB   | II~III | Lung                                         |
| 7          | F      | 47  | ADC                          | T2N0M0             | IB    | I~II   | Lung                                         |
| 8          | M      | 51  | SCC                          | T2N1M0             | IIB   | I      | Lung                                         |
| 9          | M      | 45  | Bronchioloalveolar carcinoma | T2N0M0             | IB    | N/A    | Lung                                         |
| 10         | F      | 55  | ADC                          | T2N0M0             | IB    | III    | Lung                                         |
| 11         | M      | 43  | SCC                          | T2N1M0             | IIB   | III    | Lung                                         |
| 12         | M      | 77  | SCC                          | T2N0M0             | IB    | I~II   | Lung                                         |
| 13         | M      | 53  | SCC                          | T2N0M0             | IB    | I~II   | Lung                                         |
| 14         | M      | 55  | SCC                          | T2N1M0             | IIB   | III    | Lung                                         |
| 15         | F      | 42  | ADC                          | T3N1M0             | IIIA  | II     | Lung                                         |
| 16         | M      | 74  | ADC                          | T3N2M0             | IIIA  | II     | Lung                                         |
| 17         | M      | 48  | ADC                          | T2N0M0             | IB    | II~III | Lung                                         |
| 18         | F      | 39  | SCC                          | T2N0M0             | IB    | III    | Lung                                         |
| 19         | M      | 54  | SCC                          | T2N0M0             | IB    | III    | Lung                                         |
| 20         | F      | 66  | Papillary ADC                | T2N0M0             | IB    | N/A    | Lung                                         |
| 21         | M      | 55  | ADC                          | T2N0M0             | IB    | N/A    | Lung                                         |
| 22         | M      | 55  | SCC                          | T2N0M0             | IB    | II     | Lung                                         |
| 23         | M      | 53  | ADC                          | T2N0M0             | IB    | III    | Lung                                         |
| 24         | M      | 57  | SCC                          | T2N0M0             | IB    | II~III | Lung                                         |
| 25         | M      | 44  | SCC                          | T2N0M0             | IB    | II~III | Lung                                         |
| 26         | M      | 53  | SCC                          | T2N0M0             | IB    | III    | Lung                                         |
| 27         | M      | 65  | SCC                          | T2N0M0             | IB    | I      | Lung                                         |
| 28         | M      | 47  | Papillary ADC                | T2N0M0             | IB    | N/A    | Lung                                         |
| 29         | M      | 46  | ADC                          | T2N0M0             | IB    | II     | Lung                                         |
| 30         | M      | 50  | SCC                          | T2N0M0             | IB    | III    | Lung                                         |
| 31         | M      | 77  | ADC                          | T2N0M0             | IB    | II     | Lung                                         |
| 32         | M      | 57  | SCC                          | T2N0M0             | IB    | I      | Lung                                         |
| 33         | F      | 70  | ADC                          | T2N0M0             | IB    | II     | Lung                                         |
| 34         | F      | 70  | ADC                          | T2N0M0             | IB    | II     | Lung                                         |
| 35         | M      | 55  | Papillary ADC                | T2N0M0             | IB    | N/A    | Lung                                         |
| 36         | M      | 65  | SCC                          | T2N1M0             | IIB   | III    | Lung                                         |
| 37         | M      | 56  | SCC                          | T2N0M0             | IB    | II~III | Lung                                         |
| 38         | M      | 67  | SCC                          | T2N0M0             | IB    | I~II   | Lung                                         |
| 39         | M      | 78  | SCC                          | T2N0M0             | IB    | II~III | Lung                                         |
| 40         | M      | 56  | Papillary ADC                | T3N0M0             | IIB   | N/A    | Lung                                         |

Staging of lung cancer patients was done according to the TNM classification of lung carcinoma (2009). Grade I = well-differentiated; Grade II = moderately-differentiated; Grade III = poorly-differentiated. N/A = information not available.
