# Supplementary material for: Identification of beta-arrestin-1 as a diagnostic biomarker in lung cancer
Source: PubMed Central journal article supplement (PMC6162208; doi:10.1038/s41416-018-0200-0), 2018-08-06
Supplement: 41416_2018_200_MOESM4_ESM.pdf [file 41416_2018_200_MOESM4_ESM.pdf]

**Supplementary Table 4. Clinicopathological features of selected lung cancer patients from the US Biomax cohort, as provided by the manufacturer.**

| Features                       | Lung cancer diagnosis |            |
|--------------------------------|-----------------------|------------|
|                                | ADC                   | SCC        |
| N° of subjects                 | 27                    | 44         |
| Gender                         | Female                | 3          |
|                                | Male                  | 41         |
| Age (y) [median value (range)] | 57 (33-71)            | 61 (30-77) |
| Stage                          | I                     | 16         |
|                                | II                    | 6          |
|                                | III                   | 22         |
| Grade                          | I                     | 1          |
|                                | II                    | 30         |
|                                | III                   | 13         |
|                                | not available         | 0          |

Staging of lung cancer patients was done according to the TNM classification of lung carcinoma (2009). Grade I = well-differentiated; Grade II = moderately-differentiated; Grade III = poorly-differentiated.
