# Supplementary material for: Identification of beta-arrestin-1 as a diagnostic biomarker in lung cancer
Source: PubMed Central journal article supplement (PMC6162208; doi:10.1038/s41416-018-0200-0), 2018-08-06
Supplement: 41416_2018_200_MOESM5_ESM.pdf [file 41416_2018_200_MOESM5_ESM.pdf]

**Supplementary Table 5. Positivity of IHC staining in primary lung tumors in the *in-house* TMA according to tumour grade.**

| IHC markers<br>Tumour grade | ARRB1-2 |     | ARRB1 |     | TTF1 |     | NAPSA |     | KRT7 |     | KRT5-6 |     | p63 |     |
|-----------------------------|---------|-----|-------|-----|------|-----|-------|-----|------|-----|--------|-----|-----|-----|
|                             | ADC     | SCC | ADC   | SCC | ADC  | SCC | ADC   | SCC | ADC  | SCC | ADC    | SCC | ADC | SCC |
| <b>I</b>                    | 8/8     | 0/9 | 8/8   | 1/9 | 7/8  | 0/9 | 6/7   | 0/9 | 7/7  | 2/9 | 0/8    | 8/9 | 0/8 | 8/9 |
| <b>II</b>                   | 4/4     | NA  | 5/5   | NA  | 4/5  | NA  | 3/4   | NA  | 5/5  | NA  | 0/5    | NA  | 0/5 | NA  |
| <b>II~III</b>               | 1/1     | NA  | 1/1   | NA  | 0/1  | NA  | 0/1   | NA  | 1/1  | NA  | 0/1    | NA  | 0/1 | NA  |
| <b>III</b>                  | 4/4     | 0/2 | 4/4   | 0/2 | 3/4  | 0/2 | 2/4   | 0/2 | 4/4  | 0/2 | 0/4    | 2/2 | 0/4 | 2/2 |

Data are shown as number of cases with positive staining/number of total cases in each category. Grade I = well-differentiated; Grade II = moderately-differentiated; Grade III = poorly-differentiated.
