# Supplementary material for: Identification of beta-arrestin-1 as a diagnostic biomarker in lung cancer
Source: PubMed Central journal article supplement (PMC6162208; doi:10.1038/s41416-018-0200-0), 2018-08-06
Supplement: 41416_2018_200_MOESM6_ESM.pdf [file 41416_2018_200_MOESM6_ESM.pdf]

**Supplementary Table 6. Positivity of IHC staining in primary lung tumors in the amsbio TMA according to tumour grade.**

| IHC markers<br>Tumour grade | ARRB1-2 |     | ARRB1 |     | TTF1 |     | NAPSA |     | KRT7 |     | KRT5-6 |     | p63 |     |
|-----------------------------|---------|-----|-------|-----|------|-----|-------|-----|------|-----|--------|-----|-----|-----|
|                             | ADC     | SCC | ADC   | SCC | ADC  | SCC | ADC   | SCC | ADC  | SCC | ADC    | SCC | ADC | SCC |
| I                           | N/A     | 0/3 | N/A   | 0/3 | N/A  | 0/3 | N/A   | 0/3 | N/A  | 0/3 | N/A    | 3/3 | N/A | 3/3 |
| I~II                        | 1/1     | 0/4 | 1/1   | 0/4 | 0/1  | 0/4 | 1/1   | 0/4 | 1/1  | 0/4 | 0/1    | 4/4 | 0/1 | 4/4 |
| II                          | 8/8     | 0/1 | 8/8   | 0/1 | 7/8  | 0/1 | 7/7   | 0/1 | 8/8  | 0/1 | 0/8    | 1/1 | 0/8 | 1/1 |
| II~III                      | 2/2     | 0/4 | 2/2   | 0/4 | 2/2  | 0/4 | 2/2   | 0/4 | 2/2  | 0/4 | 0/2    | 4/4 | 0/2 | 4/4 |
| III                         | 2/2     | 4/9 | 1/2   | 4/9 | 1/2  | 0/9 | 1/2   | 0/9 | 1/2  | 2/9 | 0/2    | 7/9 | 0/2 | 7/9 |

Data are shown as number of cases with positive staining/number of total cases in each category. Grade I = well-differentiated; Grade II = moderately-differentiated; Grade III = poorly-differentiated. N/A = information not available.
